# Supplementary figures and images for: Large-scale preparation of macro-porous silica microspheres via sol–gel composite particles and a spray drying process
Source: Royal Society of Chemistry journal article supplement (doi:10.1039/c7ra11649g), 2017-01-01

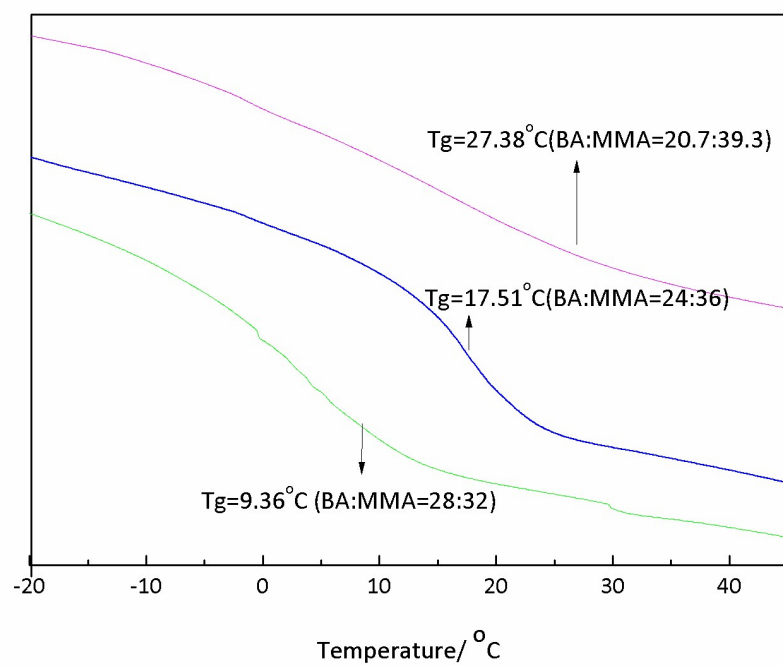

Fig.S1. DSC thermograms of latex particle with different weight ratio BA/MMA

Supplement: c7ra11649g1.pdf [file c7ra11649g1.pdf]
